# Supplementary material for: Pregnancy-Related Complications and Incidence of Atrial Fibrillation: A Systematic Review
Source: MDPI journal article supplement (doi:10.3390/jcm12041316), 2023-02-07
Supplement: s1 [file jcm-2111511-SI.pdf › jcm-2111511-SI.pdf]

## SUPPLEMENTAL MATERIAL

**Table S1. PRISMA checklist.**

| Section/topic             | # | Checklist item                                                                                                                                                                                                                                                                                              | Reported on page #                         |
|---------------------------|---|-------------------------------------------------------------------------------------------------------------------------------------------------------------------------------------------------------------------------------------------------------------------------------------------------------------|--------------------------------------------|
| <b>TITLE</b>              |   |                                                                                                                                                                                                                                                                                                             |                                            |
| Title                     | 1 | Identify the report as a systematic review, meta-analysis, or both.                                                                                                                                                                                                                                         | Title page                                 |
| <b>ABSTRACT</b>           |   |                                                                                                                                                                                                                                                                                                             |                                            |
| Structured summary        | 2 | Provide a structured summary including, as applicable: background; objectives; data sources; study eligibility criteria, participants, and interventions; study appraisal and synthesis methods; results; limitations; conclusions and implications of key findings; systematic review registration number. | 1-2                                        |
| <b>INTRODUCTION</b>       |   |                                                                                                                                                                                                                                                                                                             |                                            |
| Rationale                 | 3 | Describe the rationale for the review in the context of what is already known.                                                                                                                                                                                                                              | 3-4                                        |
| Objectives                | 4 | Provide an explicit statement of questions being addressed with reference to participants, interventions, comparisons, outcomes, and study design (PICOS).                                                                                                                                                  | 4                                          |
| <b>METHODS</b>            |   |                                                                                                                                                                                                                                                                                                             |                                            |
| Protocol and registration | 5 | Indicate if a review protocol exists, if and where it can be accessed (e.g., Web address), and, if available, provide registration information including registration number.                                                                                                                               | 4                                          |
| Eligibility criteria      | 6 | Specify study characteristics (e.g., PICOS, length of follow-up) and report characteristics (e.g., years considered, language, publication status) used as criteria for eligibility, giving rationale.                                                                                                      | 4-5                                        |
| Information sources       | 7 | Describe all information sources (e.g., databases with dates of coverage, contact with study authors to identify additional studies) in the search and date last searched.                                                                                                                                  | 4-5                                        |
| Search                    | 8 | Present full electronic search strategy for at least one database, including any limits used, such that it could be repeated.                                                                                                                                                                               | 4-5 and Table S2&3 (Supplemental Material) |
| Study selection           | 9 | State the process for selecting studies (i.e., screening, eligibility, included in systematic review, and, if applicable, included in the meta-analysis).                                                                                                                                                   | 5 and figure 1                             |

|                                    |    |                                                                                                                                                                                                                        |                                     |
|------------------------------------|----|------------------------------------------------------------------------------------------------------------------------------------------------------------------------------------------------------------------------|-------------------------------------|
| Data collection process            | 10 | Describe method of data extraction from reports (e.g., piloted forms, independently, in duplicate) and any processes for obtaining and confirming data from investigators.                                             | 6                                   |
| Data items                         | 11 | List and define all variables for which data were sought (e.g., PICOS, funding sources) and any assumptions and simplifications made.                                                                                  | 6                                   |
| Risk of bias in individual studies | 12 | Describe methods used for assessing risk of bias of individual studies (including specification of whether this was done at the study or outcome level), and how this information is to be used in any data synthesis. | 6                                   |
| Summary measures                   | 13 | State the principal summary measures (e.g., risk ratio, difference in means).                                                                                                                                          | 6-7                                 |
| Synthesis of results               | 14 | Describe the methods of handling data and combining results of studies, if done, including measures of consistency (e.g., $I^2$ ) for each meta-analysis.                                                              | 7                                   |
| Risk of bias across studies        | 15 | Specify any assessment of risk of bias that may affect the cumulative evidence (e.g., publication bias, selective reporting within studies).                                                                           | 7                                   |
| Additional analyses                | 16 | Describe methods of additional analyses (e.g., sensitivity or subgroup analyses, meta-regression), if done, indicating which were pre-specified.                                                                       | Figure S1&2 (Supplemental Material) |
| <b>RESULTS</b>                     |    |                                                                                                                                                                                                                        |                                     |
| Study selection                    | 17 | Give numbers of studies screened, assessed for eligibility, and included in the review, with reasons for exclusions at each stage, ideally with a flow diagram.                                                        | 7 and figure 1                      |
| Study characteristics              | 18 | For each study, present characteristics for which data were extracted (e.g., study size, PICOS, follow-up period) and provide the citations.                                                                           | 8-9 and table 1&2                   |
| Risk of bias within studies        | 19 | Present data on risk of bias of each study and, if available, any outcome level assessment (see item 12).                                                                                                              | Table S4                            |
| Results of individual studies      | 20 | For all outcomes considered (benefits or harms), present, for each study: (a) simple summary data for each intervention group (b) effect estimates and confidence intervals, ideally with a forest plot.               | Table 2                             |
| Synthesis of results               | 21 | Present results of each meta-analysis done, including confidence intervals and measures of consistency.                                                                                                                | 10-11                               |

|                             |    |                                                                                                                                                                                      |                                     |
|-----------------------------|----|--------------------------------------------------------------------------------------------------------------------------------------------------------------------------------------|-------------------------------------|
| Risk of bias across studies | 22 | Present results of any assessment of risk of bias across studies (see Item 15).                                                                                                      | Table S4                            |
| Additional analysis         | 23 | Give results of additional analyses, if done (e.g., sensitivity or subgroup analyses, meta-regression [see Item 16]).                                                                | Figure S1&2 (Supplemental Material) |
| <b>DISCUSSION</b>           |    |                                                                                                                                                                                      |                                     |
| Summary of evidence         | 24 | Summarize the main findings including the strength of evidence for each main outcome; consider their relevance to key groups (e.g., healthcare providers, users, and policy makers). | 11-15                               |
| Limitations                 | 25 | Discuss limitations at study and outcome level (e.g., risk of bias), and at review-level (e.g., incomplete retrieval of identified research, reporting bias).                        | 15                                  |
| Conclusions                 | 26 | Provide a general interpretation of the results in the context of other evidence, and implications for future research.                                                              | 15-16                               |
| <b>FUNDING</b>              |    |                                                                                                                                                                                      |                                     |
| Funding                     | 27 | Describe sources of funding for the systematic review and other support (e.g., supply of data); role of funders for the systematic review.                                           | 17                                  |

**Table S2: Search strategy for Ovid MEDLINE(R) from 1990 to April 06, 2020, and updated on 10 February 2022**

| <b>N</b> | <b>Search Terms</b>                                                                                                                 | <b>No. Of Identified Records</b> |
|----------|-------------------------------------------------------------------------------------------------------------------------------------|----------------------------------|
| 1        | exp pregnancy complications/                                                                                                        | 421289                           |
| 2        | exp Hypertension, Pregnancy-Induced/                                                                                                | 36094                            |
| 3        | exp Diabetes, Gestational/                                                                                                          | 12215                            |
| 4        | exp Abortion, Spontaneous/                                                                                                          | 34845                            |
| 5        | exp infant, low birth weight/                                                                                                       | 33863                            |
| 6        | exp infant, premature/                                                                                                              | 54947                            |
| 7        | exp Infant, Small for Gestational Age/                                                                                              | 7226                             |
| 8        | exp Premature Birth/                                                                                                                | 13388                            |
| 9        | exp stillbirth/                                                                                                                     | 4746                             |
| 10       | exp Fetal Death/                                                                                                                    | 29154                            |
| 11       | exp Abruptio Placentae/                                                                                                             | 2238                             |
| 12       | exp Fetal Growth Retardation/                                                                                                       | 16133                            |
| 13       | exp cardiovascular disease/                                                                                                         | 2354946                          |
| 14       | exp heart diseases/                                                                                                                 | 1113336                          |
| 15       | exp Atrial Fibrillation/                                                                                                            | 54072                            |
| 16       | (arrhythmi* or cardiac dysrhythmia* or atrial fibrillation or afib<br>or a-fib or atrial flutter* or bradycardi* or heart block* or | 293611                           |

|    |                                                                                                      |         |
|----|------------------------------------------------------------------------------------------------------|---------|
|    | tachycardi* or Tachyarrhythmi* or ventricular fibrillation* or ventricular flutter*).ab,hw,kf,kw,ti. |         |
| 17 | Epidemiologic studies/                                                                               | 8261    |
| 18 | exp case control studies/                                                                            | 1068210 |
| 19 | exp cohort studies/                                                                                  | 1975645 |
| 20 | Case control.tw.                                                                                     | 123168  |
| 21 | (cohort adj (study or studies)).tw.                                                                  | 199305  |
| 22 | Cohort analy\$.tw.                                                                                   | 7817    |
| 23 | (Follow up adj (study or studies)).tw.                                                               | 48722   |
| 24 | (observational adj (study or studies)).tw.                                                           | 103410  |
| 25 | Longitudinal.tw.                                                                                     | 239927  |
| 26 | Retrospective.tw.                                                                                    | 516331  |
| 27 | Cross sectional.tw.                                                                                  | 342651  |
| 28 | Cross-sectional studies/                                                                             | 323190  |
| 29 | 1 or 2 or 3 or 4 or 5 or 6 or 7 or 8 or 9 or 10 or 11 or 12                                          | 482610  |
| 30 | 13 or 14 or 15 or 16                                                                                 | 2420458 |
| 31 | 17 or 18 or 19 or 20 or 21 or 22 or 23 or 24 or 25 or 26 or 27 or 28                                 | 2955620 |
| 32 | 29 and 30 and 31                                                                                     | 11533   |
| 33 | limit 32 to (english language and humans and yr="1990 - Current")                                    | 9708    |
| 34 | limit 33 to ("adult (19 to 44 years)" or "middle age (45 to 64 years)" or "all aged (65 and over)")  | 5606    |

**Table S3: Search strategy for Ovid Embase from 1990 to April 06, 2020, and updated on 10 February 2022**

| <b>N</b> | <b>Search Terms</b>                                                                                                                                                                                                              | <b>No. Of Identified Records</b> |
|----------|----------------------------------------------------------------------------------------------------------------------------------------------------------------------------------------------------------------------------------|----------------------------------|
| 1        | exp pregnancy complications/                                                                                                                                                                                                     | 120416                           |
| 2        | exp Hypertension, Pregnancy-Induced/                                                                                                                                                                                             | 18081                            |
| 3        | exp Diabetes, Gestational/                                                                                                                                                                                                       | 34337                            |
| 4        | exp Abortion, Spontaneous/                                                                                                                                                                                                       | 38594                            |
| 5        | exp infant, low birth weight/                                                                                                                                                                                                    | 61045                            |
| 6        | exp infant, premature/                                                                                                                                                                                                           | 100234                           |
| 7        | exp Infant, Small for Gestational Age/                                                                                                                                                                                           | 15230                            |
| 8        | exp Premature Birth/                                                                                                                                                                                                             | 100234                           |
| 9        | exp stillbirth/                                                                                                                                                                                                                  | 16980                            |
| 10       | exp Fetal Death/                                                                                                                                                                                                                 | 36885                            |
| 11       | exp Abruptio Placentae/                                                                                                                                                                                                          | 6167                             |
| 12       | exp Fetal Growth Retardation/                                                                                                                                                                                                    | 43158                            |
| 13       | exp cardiovascular disease/                                                                                                                                                                                                      | 3985963                          |
| 14       | exp heart diseases/                                                                                                                                                                                                              | 1797664                          |
| 15       | exp Atrial Fibrillation/                                                                                                                                                                                                         | 67073                            |
| 16       | exp arrhythmias/                                                                                                                                                                                                                 | 457867                           |
| 17       | arrhythmi* or cardiac dysrhythmia* or atrial fibrillation or afib or a-fib or atrial flutter* or bradycardi* or heart block* or tachycardi* or Tachyarrhythmi* or ventricular fibrillation* or ventricular flutter*.ab,hw,kw,ti. | 487004                           |

|    |                                                                  |         |
|----|------------------------------------------------------------------|---------|
| 18 | Clinical study/                                                  | 154917  |
| 19 | case control study/                                              | 153820  |
| 20 | Family study/                                                    | 26014   |
| 21 | Longitudinal study/                                              | 137625  |
| 22 | Retrospective study/                                             | 898534  |
| 23 | Prospective study/                                               | 591336  |
| 24 | Randomized controlled trials/                                    | 176769  |
| 25 | 23 not 24                                                        | 585133  |
| 26 | Cohort analysis/                                                 | 564690  |
| 27 | (Case control adj (study or studies)).tw.                        | 131504  |
| 28 | (follow up adj (study or studies)).tw.                           | 62568   |
| 29 | (observational adj (study or studies)).tw.                       | 162440  |
| 30 | (epidemiologic\$ adj (study or studies)).tw.                     | 104996  |
| 31 | (cross sectional adj (study or studies)).tw.                     | 211389  |
| 32 | 1 or 2 or 3 or 4 or 5 or 6 or 7 or 8 or 9 or 10 or 11 or 12      | 322996  |
| 33 | 13 or 14 or 15 or 16 or 17                                       | 4029103 |
| 34 | or/18-22,25-31                                                   | 2606270 |
| 35 | 32 and 33 and 34                                                 | 18264   |
| 36 | limit 35 to (human and english language and yr="1990 - Current") | 16858   |
| 37 | limit 36 to (adult <18 to 64 years> or aged <65+ years>)         | 7989    |

**Table S4. Baseline characteristics of the participants in the included studies.**

| Characteristics                  | Ray <i>et al</i> <sup>2</sup>                                 | Leon <i>et al</i> <sup>3</sup>                                                           | Honigberg <i>et al</i> <sup>4</sup>            | Yu <i>et al</i> <sup>7</sup>    | Park <i>et al</i> <sup>8</sup>                                          | Oliver-Williams <i>et al</i> <sup>9</sup>   |
|----------------------------------|---------------------------------------------------------------|------------------------------------------------------------------------------------------|------------------------------------------------|---------------------------------|-------------------------------------------------------------------------|---------------------------------------------|
| <b>Race/ Ethnicity</b>           | Not reported                                                  | White                                                                                    | Caucasian                                      | Danish origin                   | Not reported                                                            | White                                       |
| Exposed, n(%)                    | -                                                             | 21,082 (82.5)                                                                            | 2,623 (93.4)                                   | 15,911 (75)                     | -                                                                       | 55,706 (74.8)                               |
| Non-exposed, n(%)                | -                                                             | 1,021,267 (79.9)                                                                         | 204,894 (94.3)                                 | 854,315 (87)                    | -                                                                       | 1,598,198 (72.7)                            |
| <b>Hypertension, definition</b>  | ICD-9 and ICD 10-CA $\leq$ 1 year before the index birth date | ICD10 and Read codes or BP readings or medication before one year of the index pregnancy | ICD-9 and ICD-10 or self-reported at enrolment | Excluded                        | Excluded but BP reading before birth included<br>Systolic BP, mean (SD) | Excluded                                    |
| Exposed, n(%)                    | 15,395 (20.5)                                                 | 2,117 (8.3)                                                                              | 1,889 (67.3)                                   | -                               | 118.0 (13.9)                                                            | -                                           |
| Non-exposed, n(%)                | 24,751 (2.3)                                                  | 27,027 (2.1)                                                                             | 55,098 (25.4)                                  | -                               | 110.4 (11)                                                              | -                                           |
| <b>Diabetes, definition</b>      | ICD-9 and 10-CA before the index birth date                   | ICD10 and Read code                                                                      | ICD 9-10 or self-reported at enrolment         | Excluded                        | FBS, mg/dL reading before birth                                         | ICD-10 using CALIBER algorithm before birth |
| Exposed, n(%)                    | 6,974 (9.3)                                                   | 358 (1.4)                                                                                | 177 (6.3)                                      | -                               | 89.5 (19.3)                                                             | 527 (0.7)                                   |
| Non-exposed, n(%)                | 56,034 (5.3)                                                  | 3,020 (0.2)                                                                              | 8,828 (4.1)                                    | -                               | 86.8 (12.6)                                                             | 3,886 (0.2)                                 |
| <b>Obesity, definition</b>       | ICD-9 and ICD-10 CA $\leq$ 1 year before index birth date     | BMI measurement between 16 weeks' gestation and 5 years before the index pregnancy       | BMI at enrolment, mean (SD)                    | Pre-pregnancy obesity (yes, no) | BMI before birth $>30$ kg/m <sup>2</sup>                                | Not reported                                |
| Exposed, n(%)                    | 2,363 (3.1)                                                   | 2,735 (23.6)                                                                             | 28.1 (5.6)                                     | 3,918 (18)                      | 7,784 (20.9)                                                            | -                                           |
| Non-exposed, n(%)                | 15,263 (1.4)                                                  | 47,284 (13)                                                                              | 27.1 (5.1)                                     | 37,267 (4)                      | 157,526 (7.9)                                                           | -                                           |
| <b>Dyslipidaemia, definition</b> | ICD-9 and 10-CA $\leq$ 1 year before the index birth date     | Not reported                                                                             | ICD 9-10 or self-reported at enrolment         | Not reported                    | Total cholesterol, mg/dL reading before birth                           | Not reported                                |
| Exposed, n(%)                    | 628 (0.8)                                                     | -                                                                                        | 305 (10.9)                                     | -                               | 181.0 (32.7)                                                            | -                                           |

|                            |                                                                                      |                                                                     |               |                                    |                |              |
|----------------------------|--------------------------------------------------------------------------------------|---------------------------------------------------------------------|---------------|------------------------------------|----------------|--------------|
| Non-exposed, n(%)          | 6,930 (0.7)                                                                          | -                                                                   | 24,523 (11.3) | -                                  | 175.8 (33.6)   | -            |
| <b>Smoking, definition</b> | Drug dependence or smoking ICD-9 and ICD-10 CA $\leq$ 1 year before index birth date | ICD10 and read the code closest to the start of the index pregnancy | Not clear     | Smoking during pregnancy (yes, no) | Current smoker | Not clear    |
| Exposed, n(%)              | 1,015 (1.3)                                                                          | 5,361 (34.9)                                                        | 928 (33.0)    | 3,278 (17)                         | 1,810 (4.9)    | 1,595 (2.1)  |
| Non-exposed, n(%)          | 11,111 (1.1)                                                                         | 193,893 (39.3)                                                      | 88,399 (40.7) | 123,130 (18)                       | 76,931 (3.9)   | 47,232 (2.1) |
| <b>Multifetal</b>          |                                                                                      |                                                                     | Not reported  | Not reported                       |                | Excluded     |
| Exposed, n(%)              | 3,661 (4.9)                                                                          | 1,210 (6.00)                                                        | -             | -                                  | 2244 (6.0)     | -            |
| Non-exposed, n(%)          | 16,719 (1.6)                                                                         | 29,261 (2.80)                                                       | -             | -                                  | 30 041 (1.5)   | -            |

CALIBER: Cardiovascular disease research using linked bespoke studies and electronic health records: FBS: Fasting Blood Sugar; BP: blood pressure; mg/dL: Milligrams per decilitre; SD: Standard deviation

**Table S5. Risk of Bias Assessment in included Studies using Newcastle-Ottawa Scale.<sup>1</sup>**

| Study ID                                             | Selection | Comparability | Outcome/<br>exposure | Overall<br>stars | Overall<br>Assessment* |
|------------------------------------------------------|-----------|---------------|----------------------|------------------|------------------------|
| Ray et al, 2012 <sup>2</sup>                         | 4         | 2             | 2                    | 8                | Good                   |
| Leon et al, 2019 <sup>3</sup>                        | 4         | 2             | 2                    | 8                | Good                   |
| Honigberg et al, 2019 <sup>4</sup>                   | 3         | 1             | 2                    | 6                | Good                   |
| Garovic et al, 2020 <sup>5</sup>                     | 4         | 2             | 3                    | 9                | Good                   |
| Auger et al, 2020 <sup>6</sup>                       | 4         | 2             | 3                    | 9                | Good                   |
| Yu et al, 2021 <sup>7</sup>                          | 4         | 2             | 3                    | 9                | Good                   |
| Park et al, 2022 <sup>8</sup>                        | 4         | 2             | 2                    | 8                | Good                   |
| Oliver-Williams <i>et al.</i> ,<br>2022 <sup>9</sup> | 4         | 2             | 2                    | 8                | Good                   |

\*The scoring system as follows:

- Good quality: 3 or 4 stars in selection domain and 1 or 2 stars in comparability domain and 2 or 3 stars in outcome/exposure domain.
- Fair quality: 2 stars in selection domain and 1 or 2 stars in comparability domain and 2 or 3 stars in outcome/exposure domain.
- Poor quality: 0 or 1 star in selection domain OR 0 stars in comparability domain OR 0 or 1 stars in outcome/exposure domain.

## References

1. Wells GA, Shea B, O'Connell Da, et al. The Newcastle-Ottawa Scale (NOS) for assessing the quality of nonrandomised studies in meta-analyses. In: Oxford; 2000.
2. Ray JG, Schull MJ, Kingdom JC, Vermeulen MJ. Heart failure and dysrhythmias after maternal placental syndromes: HAD MPS Study. *Heart*. 2012;98(15):1136-1141.
3. Leon LJ, McCarthy FP, Direk K, et al. Preeclampsia and Cardiovascular Disease in a Large UK Pregnancy Cohort of Linked Electronic Health Records: A CALIBER Study. *Circulation*. 2019;140(13):1050-1060.
4. Honigberg MC, Zekavat SM, Aragam K, et al. Long-Term Cardiovascular Risk in Women With Hypertension During Pregnancy. *J Am Coll Cardiol*. 2019;74(22):2743-2754.
5. Garovic VD, White WM, Vaughan L, et al. Incidence and Long-Term Outcomes of Hypertensive Disorders of Pregnancy. *J Am Coll Cardiol*. 2020;75(18):2323-2334.
6. Auger N, Potter BJ, He S, Healy-Profitos J, Schnitzer ME, Paradis G. Maternal Cardiovascular Disease 3 Decades After Preterm Birth: Longitudinal Cohort Study of Pregnancy Vascular Disorders. *Hypertension*. 2020;75(3):788-795.
7. Yu Y, Soohoo M, Sorensen HT, Li J, Arah OA. Gestational Diabetes Mellitus and the Risks of Overall and Type-Specific Cardiovascular Diseases: A Population- and Sibling-Matched Cohort Study. *Diabetes Care*. 2022;45(1):151-159.
8. Park Y, Cho GJ, Roh SY, Na JO, Oh MJ. Increased Cardiac Arrhythmia After Pregnancy-Induced Hypertension: A South Korean Nationwide Database Study. *J Am Heart Assoc*. 2022;11(2):e023013.
9. Oliver-Williams C, Stevens D, Payne RA, Wilkinson IB, Smith GCS, Wood A. Association between hypertensive disorders of pregnancy and later risk of cardiovascular outcomes. *BMC Med*. 2022;20(1):19.
